# Supplementary material
Source: HighWire-hosted journal article supplement (http://www.cmaj.ca/highwire/filestream/80387/field_highwire_adjunct_files/0/210523-res-1-at.pdf)
Supplement: 210523-res-1-at.pdf [file 210523-res-1-at.pdf]

## APPENDIX 1

### Detailed Methods

#### Overview

This eAppendix details the methodology used in assessing the cost-effectiveness of apixaban compared to usual care for the primary thromboprophylaxis of cancer patients.

#### Patient Characteristics

A total of 574 patients were included in the AVERT trial, recruited from 13 Canadian centres. The mean age was 61.5 years and 58.2% of patients were women. Gynecologic cancers accounted for 25.8% of patients, lymphoma for 25.3%, and pancreatic cancer for 13.6%. Patients remained on treatment for a median of 157 days (interquartile 78 to 168) in the apixaban group and 155 days (interquartile 83 to 168) in the placebo group.

#### Model Description

Patients with newly diagnosed cancer or cancer relapse after complete or partial remission, with a modified Khorana score of  $\geq 2$ , entered the model in the state 'Primary thromboprophylaxis, without complications' where they received apixaban or placebo. Patients in this state were at risk of CRNMB, major bleeding (excluding ICH) and VTE. ICH was excluded from possible major bleeding events in this part of the model because no ICH events were observed in the AVERT trial, despite the inclusion of patients with primary brain tumours or intra-cranial metastases. Patients could remain in this state indefinitely or transition to 'CRNMB', 'major bleeding', or 'First VTE', based on the risk of developing each complication. Patients who transitioned to 'CRNMB' remained in this state for one cycle before moving back to 'Primary thromboprophylaxis, without complications'. Patients in the state 'CRNMB' were also at risk of a first VTE and major bleeding. Patients who transitioned to 'major bleeding' were at risk of a first VTE, based on the baseline VTE risk among cancer patients. Patients in the state 'Major bleeding' who did not experience subsequent complications moved to 'Off treatment', as primary thromboprophylaxis was discontinued for these patients. Patients in the state 'Off treatment' were at risk of CRNMB, major bleeding, and VTE, based on the baseline risk for these complications among cancer patients who do not receive primary thromboprophylaxis.

Patients who experienced a first VTE event entered the second part of the model. Patients in the state 'First VTE' were at risk of CRNMB, major bleeding, and ICH, based on the risk of these complications among cancer patients receiving a full-dose anticoagulant for VTE treatment. Patients in the state 'First VTE' who did not experience subsequent complications transitioned to 'Secondary thromboprophylaxis, without complications', where they received dalteparin at a reduced dose (150 units per Kg), per the CLOT trial regimen (14). Patients in the state 'Secondary thromboprophylaxis, without complications' were at risk of CRNMB, major bleeding, ICH, recurrent VTE, CTEPH, and PTS. Patients who experienced major bleeding or ICH did not resume anticoagulation treatment.

Patients who transitioned to 'ICH' were at risk of CRNMB, non-ICH major bleeding, and recurrent VTE, based on the risk of these complications among cancer patients with a history of VTE, who are not receiving anticoagulant treatment. The state 'ICH' was comprised of major ICH events (leading to important long-term disability) and minor ICH events (leading to no long-term disability). The proportion of patients experiencing major or minor ICH was taken from a large American

retrospective cohort of cancer patients who developed spontaneous ICH <sup>1</sup>. Patients who experienced major ICH and no subsequent complications transitioned to the 'Post-ICH' state, where they incurred post event management costs over their remaining lifetime, due to significant disability. Patients who experienced a minor ICH transitioned to 'Off treatment'.

Patients who suffered a recurrent VTE event were at risk of subsequent complications, based on the risk of complications among cancer patients who are treated with a dose escalation of dalteparin <sup>2</sup>. Patients who did not experience subsequent complications after a recurrent VTE event moved back to 'Secondary thromboprophylaxis, without complications'.

Patients who experienced CTEPH and PTS transitioned directly to 'post-CTEPH' and 'post-PTS' health states, respectively, where they incurred post-event management costs over their remaining lifetime.

Patients could transition to death at any point in time due to age-specific mortality, cancer or complications.

Input parameters

*Transition Probabilities*

*Model Part 1*

The baseline time-varying risk of VTE over a 6-month period from initiation of chemotherapy was derived using patient data from the placebo arm of the AVERT trial <sup>3</sup>. The VTE risk between 6 months to 5 years from initiation of chemotherapy was estimated as a weighted average of VTE risk by tumour type, with weights being the proportion of patients with each tumour type in the AVERT trial. The time-varying VTE risk for each tumor type was derived from published Kaplan Meir (KM) curves representing the cumulative VTE risk, stratified by tumor type, as reported in a study by Blix et al. <sup>4</sup>. The study estimated the cumulative incidence of VTE over 2 years from cancer diagnosis for each tumour type, with death as a competing risk. We extracted patient-level data from the KM curves using 'WebPlotDigitizer' <sup>5</sup>. The VTE risk was extrapolated to a period of up to 5 years by fitting parametric survival models (Weibull, Gompertz, and Exponential) to the digitized data. Model selection was based on Akaike information criterion (AIC) and Bayesian information criterion (BIC) values. The model with the lowest AIC and BIC values was selected. The VTE risk in the non-cancer population was applied after 5 years from initiation of chemotherapy. This last VTE risk was sourced from a retrospective cohort study that assessed the incidence of VTE in the province of Alberta, Canada, over one decade <sup>6</sup>.

The baseline risk for a first VTE was also used to estimate the proportion of patients who transitioned from the states 'CRNMB', 'major bleeding', and 'off treatment' to 'first VTE', as there is a lack of evidence suggesting an increased VTE risk among cancer patients with a previous bleeding episode.

The baseline risk of CRNMB and major bleeding among ambulatory cancer patients receiving chemotherapy, with no prior history of VTE, was obtained from the placebo arm of the AVERT trial. The major bleeding risk in the non-cancer population was applied after 5 years from initiation of chemotherapy. This major bleeding risk was obtained from a meta-analysis of incidence rates of major bleeding in patients randomized to placebo or observation, following treatment of VTE <sup>7</sup>.

We assumed the risk of rebleed to be equal to the baseline risk of major bleeding, as existing studies reported an increased risk of rebleed only when anticoagulant treatment was resumed<sup>8</sup>. Our model, however, assumed that apixaban was discontinued if major bleeding occurred, based on the AVERT trial protocol.

A treatment discontinuation rate as a result of non-adherence or intolerance was estimated using data from the AVERT trial<sup>3</sup> and was applied to patients in both treatment arms.

### *Model Part 2*

The risk of recurrent VTE, CRNMB, and major bleeding among cancer patients receiving dalteparin for the treatment of CAT was obtained from the per-protocol results of the HOKUSAI VTE Cancer trial<sup>9</sup>. The HOKUSAI VTE Cancer trial was chosen as the source for the risk of recurrent VTE, CRNMB, and major bleeding in cancer patients receiving anticoagulation treatment for CAT given the available length of follow up (up to 12 months), which is greater than other trials; the contemporaneity of the results, which better reflect the risk of complications in this patient population based on the current anti-neoplastic management options; and the similarity between the AVERT and HOKUSAI VTE Cancer patient populations (specifically, both trials included patients with primary brain tumors or brain metastases).

Additionally, we performed a scenario analysis where 50% of patients received LMWH and 50% received a direct oral Xa inhibitor for the treatment of CAT. The incidence of complications among patients treated with a direct oral Xa inhibitor was abstracted from the per-protocol results for the edoxaban treatment arm of the HOKUSAI VTE Cancer trial<sup>9</sup>.

Given the rarity of ICH in HOKUSAI VTE Cancer, the risk of ICH among cancer patients who received dalteparin for the treatment of CAT was obtained from a systematic review and meta-analysis of studies assessing the safety of LMWH in this patient population<sup>10</sup>.

Additionally, the risk of CTEPH among cancer patients on anticoagulant treatment for secondary thromboprophylaxis was abstracted from a meta-analysis of the incidence of CTEPH after acute PE<sup>11</sup>. The risk of PTS was obtained from the SOX trial, which evaluated the use of elastic compression stockings to prevent PTS among patients with a history of DVT<sup>12</sup>.

The incidence of CRNMB, major bleeding and ICH among cancer patients who received a dose escalation of dalteparin to treat recurrent VTE was sourced from a cohort study evaluating the efficacy and safety of LMWH dose escalation in cancer patients with recurrent VTE<sup>2</sup>, with the proportion of cancer patients with major and minor ICH determined as previously described<sup>1</sup>.

The risk of CRNMB and major bleeding among cancer patients with a history of VTE who are off anticoagulation treatment was abstracted from the placebo arm of the AVERT trial. The risk of ICH among cancer patients with a history of VTE who are off-treatment was obtained from a cohort study that assessed the incidence of ICH in an Italian population-based stroke registry<sup>13</sup>. The risk of recurrent VTE among cancer patients with a history of VTE who are off-treatment was determined as a weighted average of recurrent VTE risk by tumor type (weights being the proportion of patients with each tumor type in the AVERT trial). The age-adjusted incidence of recurrent VTE for each tumor type was obtained from a cohort study based in the United Kingdom (UK)<sup>14</sup>.

The relative risk of VTE and CRNMB as a result of apixaban was derived from the AVERT trial using on-treatment analysis<sup>3</sup>. The AVERT trial was insufficiently powered to detect a difference in bleeding outcomes between the treatment arms. To account for this uncertainty, an estimate for the relative risk of major bleeding as a result of low-dose direct oral Xa inhibitor therapy was taken from a meta-analysis of AVERT and CASSINI, the two trials that evaluated the use of these agents for primary thromboprophylaxis among intermediate to high-risk ambulatory cancer patients<sup>15</sup>. The relative risk of complications as a result of apixaban was applied to the baseline risk of each complication for patients in the state 'Primary thromboprophylaxis, without complications'.

The HR for increased risk of death due to cancer was estimated as a weighted average of the age-standardized mortality rate by tumor type<sup>16</sup>. The proportion of patients with each tumor type in the AVERT trial was used as weights in the estimation of mortality due to cancer<sup>3</sup>. The HR for mortality due to cancer was applied to the age-adjusted mortality rate of the Canadian general population to determine the background mortality of patients in the model<sup>17</sup>.

The HR for the risk of death due to VTE was extracted from a retrospective cohort study comparing survival of cancer patients with VTE to a matched cohort of cancer patients who did not have VTE, over one year<sup>18</sup>. The HR for mortality due to major bleeding in the model was estimated from a retrospective cohort study of patients who had gastrointestinal bleeding (GIB)<sup>19</sup>. The HR for mortality due to ICH was obtained from a cohort study that compared mortality between patients who survived a haemorrhagic stroke with a matched cohort from the general population<sup>20</sup>. The HR for mortality as a result of CTEPH was derived from a prospective cohort study evaluating long-term outcomes for patients diagnosed with CTEPH<sup>21</sup>. Excess mortality due to CTEPH was estimated as a ratio of mortality due to CTEPH and mortality for the general population<sup>21</sup>.

## Costs

### Complications

The VTE cost was estimated as a weighted average of treatment costs of PE and DVT, where the proportion of patients with each VTE type in the AVERT trial was used as weights<sup>3</sup>. Resources required for the treatment of PE and DVT, such as the proportion of patients managed as inpatient and outpatient, typical diagnostic tests, outpatient physician consultations, mean inpatient length of stay, and number of inpatient physician consultations, were obtained from a Canadian cost-effectiveness study of oral anticoagulants for VTE treatment<sup>22</sup>. Based on consultations with clinical experts and the published guidelines for prevention and treatment of CAT, we used the cost of dalteparin to represent the cost of medication to treat and manage cancer patients with VTE in our primary analysis. Information on follow up outpatient visits for long-term management of cancer patients with a history of VTE was obtained through consultation with clinical experts. In the scenario analysis where 50% of patients with CAT received LMWH and 50% received a direct oral Xa inhibitor, we used the cost of edoxaban to represent the cost of oral anticoagulation treatment. Furthermore, the drug cost for the treatment of recurrent VTE was assumed to be 1.2 times that for a first VTE, based on the dose escalation to 125% of the weight-based LMWH usual dose for the treatment of breakthrough VTE on full-dose anticoagulation in cancer patients.

The cost of treating major bleeding was calculated as a weighted average of treatment costs for each major bleeding type observed among patients in the AVERT trial<sup>3</sup>. The treatment costs for each major bleeding type included the cost of inpatient stay, a specialist consultation, and a follow up consultation. Data on resource use for treating a CRNMB episode was obtained from the published literature<sup>22</sup>. The cost of care per stay for an ICH event was extracted from a cohort study of ICH patients in a Canadian center<sup>23</sup>. Post event management costs for major ICH, as well as the treatment and long-term management costs for CTEPH and PTS, were sourced from published Canadian studies<sup>22-24-26</sup>.

The costs of diagnostic tests and laboratory monitoring for long-term management of cancer patients who experienced VTE was obtained from an economic evaluation of the CLOT trial for secondary prophylaxis of VTE among cancer patients<sup>27</sup>. The unit costs of diagnostic tests to detect PE and DVT were obtained from published Canadian sources<sup>22-28</sup>. The unit costs of physician and specialist visits were extracted from the Ontario's Schedule of Benefits<sup>29</sup>. Per day hospital costs for patients diagnosed with PE and DVT were obtained from the Ontario Case Costing Initiative (OCCI)<sup>28</sup>. The inpatient costs for each type of major bleeding event observed in the AVERT trial was abstracted from the OCCI<sup>28</sup>. The daily acquisition costs of apixaban, dalteparin, and edoxaban were obtained from the Ontario Drug Benefit Formulary<sup>30</sup>.

### *Health Utility Values*

The baseline health utility value was calculated as a weighted average of utility values for cancer patients in remission by tumour type. The proportion of patients with each tumour type in the AVERT trial was used as weights in the estimation of the baseline utility value<sup>3</sup>. The utility values for remission according to each tumour type were obtained through a targeted literature search<sup>31-47</sup>. Where multiple utility values were available, each one was assessed regarding its applicability to our patient population and purpose, credibility, and consistency. Preference was therefore given to contemporary utility values taken from the Canadian setting.

An event specific disutility was applied to the baseline utility in patients who experienced a complication. The disutility value for VTE was estimated as a weighted average of disutility values for PE and DVT, where the proportion of patients with each VTE type in the AVERT trial was used as weights.

The disutility value for major bleeding was estimated from the disutility value for GI bleed. The disutility value for ICH was calculated as a weighted average of disutility values for minor and major ICH. The disutility values for PE, DVT, GI bleed, minor ICH, and major ICH were derived from a Canadian study that estimated utility values for patients with a history of VTE, using a standard gamble technique<sup>48</sup>. The disutility values for CRNMB were obtained from a UK-based study that reported EQ5D utility scores for a variety of chronic conditions<sup>31</sup>. The disutility value for CTEPH and the utility value for post-CTEPH were derived from a UK-based study that measured utility values for patients with pulmonary hypertension, using the Cambridge Pulmonary Hypertension Outcome Review (CAMPHOR) Utility Index<sup>49</sup>. The disutility values for PTS and post-PTS states were derived from a previous study that elicited utility values for PTS from volunteers and physicians, using the standard gamble technique<sup>50</sup>.

Previous studies on the cost-effectiveness of apixaban in non-cancer populations have accounted for a utility decrement as a result of administering apixaban. However, this value was derived from evidence on the reduction in quality of life as a result of warfarin for stroke prophylaxis in atrial fibrillation patients <sup>51</sup>. We derived a health utility decrement due to apixaban from the SF-36 data measured in the AVERT trial. However, no statistically significant reduction in utility as a result of apixaban was observed. As a result, this utility decrement was not applied in our model.

**Table A1 Model Input Parameters and Key Assumptions**

| Parameter                                                                         | Mean                     | SD/SE/(95% CI) | Reported Follow-Up Period (Years) | Source                                                       | Assumptions/ Notes                                                                                                                                                                                                                                                 |
|-----------------------------------------------------------------------------------|--------------------------|----------------|-----------------------------------|--------------------------------------------------------------|--------------------------------------------------------------------------------------------------------------------------------------------------------------------------------------------------------------------------------------------------------------------|
| <b>TRANSITION PROBABILITY</b>                                                     |                          |                |                                   |                                                              |                                                                                                                                                                                                                                                                    |
| <b>Model Part 1 - Cancer patients on treatment for primary prophylaxis of VTE</b> |                          |                |                                   |                                                              |                                                                                                                                                                                                                                                                    |
| Baseline risk of primary VTE (0-6 months)                                         | <i>Time variant risk</i> |                |                                   | AVERT trial, placebo arm; On-treatment analysis <sup>3</sup> |                                                                                                                                                                                                                                                                    |
| Baseline risk of primary VTE (6 months - 5 years)                                 | <i>Time variant risk</i> |                |                                   | Blix et al. <sup>4</sup>                                     |                                                                                                                                                                                                                                                                    |
| Baseline risk of primary VTE (>5 years)                                           | 0.0001                   |                | 1.0                               | Alotaibi et al.; Data from Alberta, Canada <sup>6</sup>      | Equal to that in the general population.                                                                                                                                                                                                                           |
| Baseline risk of major bleeding (0-5 years)                                       | 0.0109                   | 0.0063         | 0.5                               | AVERT trial, placebo arm; On-treatment analysis <sup>3</sup> |                                                                                                                                                                                                                                                                    |
| Baseline risk of major bleeding (>5 years)                                        | 0.0045                   | 0.0009         | 1.0                               | Castellucci et al. <sup>7</sup>                              | Equal to that in the general population;<br><br>Source - Systematic review and metaanalysis of the literature to summarize the rates of major bleeding and fatal bleeding in patients randomized to placebo or observation during the secondary prevention of VTE. |
| Baseline risk of CRNMB                                                            | 0.0509                   | 0.0133         | 0.5                               | AVERT trial, placebo arm; On-treatment analysis <sup>3</sup> |                                                                                                                                                                                                                                                                    |
| Drug discontinuation rate (unrelated to death/VTE/bleed), monthly                 | 0.0590                   |                |                                   | AVERT trial data <sup>52</sup>                               |                                                                                                                                                                                                                                                                    |
| <b>Model Part 2</b>                                                               |                          |                |                                   |                                                              |                                                                                                                                                                                                                                                                    |
| <b>For cancer patients with a history of VTE, on treatment</b>                    |                          |                |                                   |                                                              |                                                                                                                                                                                                                                                                    |

Appendix 1, as supplied by the authors. Appendix to: Kimpton M, Kumar S, Wells PS, et al. Cost-utility analysis of apixaban compared with usual care for primary thromboprophylaxis in ambulatory patients with cancer. *CMAJ* 2021. doi: 10.1503/cmaj.210523. Copyright © 2021 The Author(s) or their employer(s). To receive this resource in an accessible format, please contact us at [cmajgroup@cmaj.ca](mailto:cmajgroup@cmaj.ca).

|                                                                                                          |        |        |     |                                                                                                                                        |                                                                                                                                             |
|----------------------------------------------------------------------------------------------------------|--------|--------|-----|----------------------------------------------------------------------------------------------------------------------------------------|---------------------------------------------------------------------------------------------------------------------------------------------|
| <b>for secondary prophylaxis of VTE</b>                                                                  |        |        |     |                                                                                                                                        |                                                                                                                                             |
| Risk of CRNMB                                                                                            | 0.1709 | 0.0167 | 1.0 | After Primary VTE: HOKUSAI VTE Cancer trial; On-treatment analysis <sup>9</sup><br>After Recurrent VTE: Ihaddadene et al. <sup>2</sup> |                                                                                                                                             |
| Risk of major bleeding (non- ICH)                                                                        | 0.0495 | 0.0096 | 1.0 | After Primary VTE: HOKUSAI VTE Cancer trial; On-treatment analysis <sup>9</sup><br>After Recurrent VTE: Ihaddadene et al. <sup>2</sup> |                                                                                                                                             |
| Risk of ICH                                                                                              | 0.0036 | 0.0026 | 0.5 | After Primary VTE: Roja-Hernandez et al. <sup>10</sup><br>After Recurrent VTE: Ihaddadene et al. <sup>2</sup>                          |                                                                                                                                             |
| Risk of recurrent VTE                                                                                    | 0.1345 | 0.0151 | 1.0 | HOKUSAI VTE Cancer trial; On-treatment analysis <sup>9</sup>                                                                           |                                                                                                                                             |
| Risk of CTEPH                                                                                            | 0.0320 | 0.0061 | 2.0 | Ende-Verhaar et al. <sup>11</sup>                                                                                                      | Only patients in state 'On treatment for secondary prophylaxis' can transition to CTEPH or PTS                                              |
| Risk of PTS                                                                                              | 0.1270 | 0.0168 | 2.0 | SOX trial, placebo arm <sup>12</sup>                                                                                                   |                                                                                                                                             |
| <b>For cancer patients with a history of VTE, who are off treatment for secondary thromboprophylaxis</b> |        |        |     |                                                                                                                                        |                                                                                                                                             |
| Risk of CRNMB                                                                                            | 0.0509 | 0.0133 | 0.5 | AVERT trial, placebo arm; On-treatment analysis <sup>3</sup>                                                                           |                                                                                                                                             |
| Risk of major bleeding (non-ICH)                                                                         | 0.0109 | 0.0063 | 0.5 | AVERT trial, placebo arm; On-treatment analysis <sup>3</sup>                                                                           |                                                                                                                                             |
| Risk of ICH                                                                                              | 0.0003 | 0.0001 | 1.0 | Sacco et al. <sup>13</sup>                                                                                                             |                                                                                                                                             |
| Risk of recurrent VTE                                                                                    | 0.0838 | 0.0086 | 1.0 | Cohen et al. <sup>14</sup>                                                                                                             | Calculated as a weighted average of recurrent VTE incidence by cancer type; Weights being proportion of each cancer type in the AVERT trial |
| <b>Mortality Rates</b>                                                                                   |        |        |     |                                                                                                                                        |                                                                                                                                             |

Appendix 1, as supplied by the authors. Appendix to: Kimpton M, Kumar S, Wells PS, et al. Cost-utility analysis of apixaban compared with usual care for primary thromboprophylaxis in ambulatory patients with cancer. *CMAJ* 2021. doi: 10.1503/cmaj.210523. Copyright © 2021 The Author(s) or their employer(s). To receive this resource in an accessible format, please contact us at [cmajgroup@cmaj.ca](mailto:cmajgroup@cmaj.ca).

|                                                                                           |       |                |  |                                                                                            |                                                                                                                                                                                                                                                                                                                        |
|-------------------------------------------------------------------------------------------|-------|----------------|--|--------------------------------------------------------------------------------------------|------------------------------------------------------------------------------------------------------------------------------------------------------------------------------------------------------------------------------------------------------------------------------------------------------------------------|
| Baseline age-adjusted mortality for general population                                    |       |                |  | Statistics Canada <sup>17</sup>                                                            |                                                                                                                                                                                                                                                                                                                        |
| Excess mortality due to cancer                                                            | 10.97 |                |  | Canadian Cancer Statistics, 2018 <sup>16</sup>                                             | Weighted average of age-adjusted standardized mortality rate by tumour site; Weights being proportion of each cancer type in the AVERT trial                                                                                                                                                                           |
| Excess mortality due to VTE                                                               | 2.20  | (2.05, 2.40)   |  | Sorensen et al. <sup>18</sup><br>Follow up 1 year                                          |                                                                                                                                                                                                                                                                                                                        |
| Excess mortality due to major bleeding                                                    | 2.10  | (1.60, 2.90)   |  | Nagata et al. <sup>19</sup><br>Follow up 24.6 months                                       |                                                                                                                                                                                                                                                                                                                        |
| Excess mortality due to ICH                                                               | 2.60  | (2.09, 3.24)   |  | Gonzalez-Perez et al. <sup>20</sup>                                                        |                                                                                                                                                                                                                                                                                                                        |
| Excess mortality due to CTEPH                                                             | 12.25 | (10.27, 14.31) |  | Derived from Delcroix et al. <sup>21</sup>                                                 | Derived as a proportion of mortality for general population (Statistics Canada)                                                                                                                                                                                                                                        |
| <b>Relative Risk Due To Apixaban</b>                                                      |       |                |  |                                                                                            |                                                                                                                                                                                                                                                                                                                        |
| CRNMB                                                                                     | 1.296 | (0.663, 2.533) |  | Avert trial; On-treatment analysis <sup>3</sup>                                            |                                                                                                                                                                                                                                                                                                                        |
| Major Bleeding                                                                            | 1.960 | (0.800, 4.820) |  | Pooled from AVERT and CASSINI Trial, On-treatment analysis; Li et al. <sup>15</sup>        |                                                                                                                                                                                                                                                                                                                        |
| VTE                                                                                       | 0.143 | (0.043, 0.477) |  | Avert trial; On-treatment analysis <sup>3</sup>                                            |                                                                                                                                                                                                                                                                                                                        |
| Proportion of patients with ICH who have a major ICH                                      | 0.50  |                |  | Murthy et al. <sup>1</sup>                                                                 |                                                                                                                                                                                                                                                                                                                        |
| Proportion of patients who experience major bleeding and resume anticoagulation treatment | 0.00  |                |  | Li et al. <sup>53</sup>                                                                    |                                                                                                                                                                                                                                                                                                                        |
| <b>COSTS</b>                                                                              |       |                |  |                                                                                            |                                                                                                                                                                                                                                                                                                                        |
| <b>CRNMB treatment cost</b>                                                               | 383   | 122            |  | CADTH report <sup>22</sup>                                                                 | ER visit + ER physician consultation                                                                                                                                                                                                                                                                                   |
| <b>Major bleeding treatment cost (Non-ICH)</b>                                            | 9,191 | 2,424          |  | Ontario Schedule of Benefits <sup>29</sup> ; Ontario Case Costing Initiative <sup>28</sup> | Hospital costs + 1 initial specialist consultation + 1 follow-up specialist consultation.<br>Hospital costs - weighted average of inpatient costs for hematuria, epistaxis (acute), vaginal bleeding, gastrointestinal bleeding;<br>Sources for unit costs:<br>Physician consultations - Ontario Schedule of Benefits, |

Appendix 1, as supplied by the authors. Appendix to: Kimpton M, Kumar S, Wells PS, et al. Cost-utility analysis of apixaban compared with usual care for primary thromboprophylaxis in ambulatory patients with cancer. *CMAJ* 2021. doi: 10.1503/cmaj.210523. Copyright © 2021 The Author(s) or their employer(s). To receive this resource in an accessible format, please contact us at [cmajgroup@cmaj.ca](mailto:cmajgroup@cmaj.ca).



|                                     |         |                    |  |                                                                                                                                                      |                                                                                                                                                                          |
|-------------------------------------|---------|--------------------|--|------------------------------------------------------------------------------------------------------------------------------------------------------|--------------------------------------------------------------------------------------------------------------------------------------------------------------------------|
|                                     |         |                    |  |                                                                                                                                                      | Hospital costs - Ontario Case Costing Initiative (2017/18)                                                                                                               |
| <b>ICH cost</b>                     | 16,962  | 16,705             |  | Specogna et al. <sup>23</sup>                                                                                                                        | Setting - Canadian health system; Converted from US\$ using OECD PPP converter; Includes major and minor IC bleed events.                                                |
| <b>Post-ICH Cost</b>                | 756     | ± 25% of base case |  | Goeree et al. <sup>24</sup> ; CADTH report <sup>22</sup>                                                                                             |                                                                                                                                                                          |
| <b>CTEPH treatment cost</b>         | 91,412  | ± 25% of base case |  | Delcroix et al. <sup>43</sup> ; CADTH report <sup>22</sup>                                                                                           |                                                                                                                                                                          |
| <b>Post-CTEPH management costs</b>  | 140     | ± 25% of base case |  | CADTH report <sup>22</sup>                                                                                                                           | Warfarin monitoring + specialist visits                                                                                                                                  |
| <b>PTS treatment cost</b>           | 8,181   | ± 25% of base case |  | Caprini et al. <sup>25</sup> ; CADTH report <sup>22</sup>                                                                                            |                                                                                                                                                                          |
| <b>Post-PTS management cost</b>     | 299     | ± 25% of base case |  | Caprini et al. <sup>25</sup> ; CADTH report <sup>22</sup>                                                                                            |                                                                                                                                                                          |
| <b>Primary VTE treatment cost</b>   |         |                    |  |                                                                                                                                                      |                                                                                                                                                                          |
| DVT outpatient cost                 | 759     |                    |  | Resource use - CADTH report <sup>22</sup><br>Unit costs - Ontario Schedule of Benefits <sup>29</sup> , Ontario Case Costing Initiative <sup>28</sup> | 1 Doppler ultrasound<br>1 GP visit<br>1 specialist consultation<br>2 complete blood counts                                                                               |
| DVT cost per inpatient day          | 1,558   | (1000, 1,947)      |  | Ontario Case Costing Initiative (2017/18) <sup>28</sup><br>Diagnosis codes - I801,I802,I803                                                          |                                                                                                                                                                          |
| DVT length of stay                  | 6.70    | (5.00, 8.00)       |  | CADTH report <sup>22</sup>                                                                                                                           |                                                                                                                                                                          |
| DVT proportion managed as inpatient | 0.19    | (0.00, 0.40)       |  |                                                                                                                                                      |                                                                                                                                                                          |
| PE outpatient cost                  | 1,551   |                    |  | Resource use - CADTH report <sup>22</sup><br>Unit costs - Ontario Schedule of Benefits <sup>29</sup> , Ontario Case Costing Initiative <sup>28</sup> | Diagnostics, 1 GP visit, 1 specialist visit, 2 blood counts, ER visit, ER physician fee<br>Diagnostics - 1 ventilation perfusion lung scan (50%), 1 spiral CT scan (50%) |
| PE cost per inpatient day           | 1,655   | (1000, 2,563)      |  | Ontario Case Costing Initiative (2017/18) <sup>28</sup><br>Diagnosis codes - I26, I29                                                                |                                                                                                                                                                          |
| PE length of stay                   | 7.80    | (6.00, 9.00)       |  | CADTH report <sup>22</sup>                                                                                                                           |                                                                                                                                                                          |
| PE proportion managed as inpatient  | 0.67    | (0.30, 0.75)       |  | CADTH report <sup>22</sup>                                                                                                                           |                                                                                                                                                                          |
| Medication - LMWH                   | 1221.58 |                    |  | Ontario Drug Benefit Formulary <sup>30</sup>                                                                                                         | LMWH -Dalteparin at 200units per Kg for 4 weeks;                                                                                                                         |
| Medication - DOAC                   | 274.60  |                    |  | Ontario Drug Benefit Formulary <sup>30</sup>                                                                                                         | DOAC -Dalteparin at 200units per Kg for 5 days, then edoxaban 60mg daily for 25 days.                                                                                    |

Appendix 1, as supplied by the authors. Appendix to: Kimpton M, Kumar S, Wells PS, et al. Cost-utility analysis of apixaban compared with usual care for primary thromboprophylaxis in ambulatory patients with cancer. *CMAJ* 2021. doi: 10.1503/cmaj.210523. Copyright © 2021 The Author(s) or their employer(s). To receive this resource in an accessible format, please contact us at [cmajgroup@cmaj.ca](mailto:cmajgroup@cmaj.ca).

|                                                   |       |                    |  |                                                                                                                                                                                                           |                                                                                                                                                                                                                                                                                                                                  |
|---------------------------------------------------|-------|--------------------|--|-----------------------------------------------------------------------------------------------------------------------------------------------------------------------------------------------------------|----------------------------------------------------------------------------------------------------------------------------------------------------------------------------------------------------------------------------------------------------------------------------------------------------------------------------------|
| <b>Recurrent VTE treatment cost</b>               | 8,083 |                    |  |                                                                                                                                                                                                           | Hospital and outpatient costs assumed to be the same as that for primary VTE; medication dosage is 120% of that for primary VTE                                                                                                                                                                                                  |
| <b>Post VTE management costs - LMWH</b>           | 937   | ± 25% of base case |  | Source: Ontario Schedule of Benefits <sup>29</sup> , Dranitsaris et al. (for diagnostics, lab work, blood transfusions, unscheduled patient contact) <sup>27</sup> , Ontario Drug formulary <sup>30</sup> | Monthly cost averaged over 5 years;<br>Resource use:<br>0-6 months - Monthly physician visit + monthly cost of diagnostics, lab monitoring, blood transfusions, unscheduled patient contact + medication<br>>6 months - Physician visit every 3 months + medication<br><br>Medication - Dalteparin 150 units/kg daily            |
| <b>Post VTE management costs - DOAC</b>           | 144   | ± 25% of base case |  | Source: Ontario Schedule of Benefits <sup>29</sup> , Ontario Drug formulary <sup>30</sup>                                                                                                                 | Monthly cost averaged over 5 years;<br>Resource use:<br>0-6 months - Monthly physician visit + medication<br>>6 months - Physician visit every 3 months + medication<br><br>Medication - Edoxaban 60mg daily                                                                                                                     |
| <b>Apixaban, medication cost per month</b>        | 98.02 |                    |  | Source: Ontario Drug formulary <sup>30</sup>                                                                                                                                                              |                                                                                                                                                                                                                                                                                                                                  |
| <b>UTILITY VALUES</b>                             |       |                    |  |                                                                                                                                                                                                           |                                                                                                                                                                                                                                                                                                                                  |
| Baseline Health Utility Value for Cancer Patients | 0.824 | 0.045              |  | <sup>31-47</sup>                                                                                                                                                                                          | Weighted average of utility values for cancer patients in remission, by cancer site; Weights being the proportion of patients with each cancer type in the AVERT trial.                                                                                                                                                          |
| Disutility As A Result of Primary/Recurrent VTE   | 0.142 | 0.022              |  | Hogg et al. <sup>48</sup>                                                                                                                                                                                 | Weighted average of disutility values for DVT and PE, with weights being the proportion of patients who have DVT and PE in the AVERT trial. Disutility estimated as difference between utility for the general population and utility value for patient with this condition; Utility for general population from Maddigan et al. |
| Disutility As A Result of CRNMB                   | 0.013 | 0.003              |  | Sullivan et al. <sup>31</sup>                                                                                                                                                                             |                                                                                                                                                                                                                                                                                                                                  |
| Disutility As A Result of MB (Non-ICH)            | 0.270 | 0.024              |  | Hogg et al. <sup>48</sup>                                                                                                                                                                                 | Disutility estimated as difference between utility for the general population and utility value for patient with                                                                                                                                                                                                                 |

Appendix 1, as supplied by the authors. Appendix to: Kimpton M, Kumar S, Wells PS, et al. Cost-utility analysis of apixaban compared with usual care for primary thromboprophylaxis in ambulatory patients with cancer. *CMAJ* 2021. doi: 10.1503/cmaj.210523. Copyright © 2021 The Author(s) or their employer(s). To receive this resource in an accessible format, please contact us at [cmajgroup@cmaj.ca](mailto:cmajgroup@cmaj.ca).

|                                                                            |       |       |  |                                                         |                                                                                                           |
|----------------------------------------------------------------------------|-------|-------|--|---------------------------------------------------------|-----------------------------------------------------------------------------------------------------------|
|                                                                            |       |       |  |                                                         | this condition; Utility for general population from Maddigan et al.                                       |
| Disutility As A Result of Major ICH                                        | 0.770 | 0.166 |  | Hogg et al. <sup>48</sup>                               |                                                                                                           |
| Disutility As A Result of Minor ICH                                        | 0.170 | 0.094 |  | Hogg et al. <sup>48</sup>                               |                                                                                                           |
| Disutility As A Result of ICH<br>(Weighted average of major and minor ICH) | 0.470 | 0.130 |  | Hogg et al. <sup>48</sup>                               |                                                                                                           |
| Utility in Post ICH                                                        | 0.150 | 0.166 |  | Hogg et al. <sup>48</sup>                               |                                                                                                           |
| Disutility As A Result of CTEPH                                            | 0.360 | 0.016 |  | Meads et al. <sup>49</sup> ; CADTH report <sup>22</sup> | Calculated as the difference between utility value for the general population and utility value for CTEPH |
| Utility in Post CTEPH State                                                | 0.560 | 0.016 |  | Meads et al. <sup>49</sup> ; CADTH report <sup>22</sup> |                                                                                                           |
| Disutility As A Result of PTS                                              | 0.050 | 0.022 |  | Lenert et al. <sup>50</sup> ; Li et al. <sup>53</sup>   |                                                                                                           |
| Utility in Post PTS State                                                  | 0.774 | 0.045 |  | Lenert et al. <sup>50</sup>                             | Estimated as (Baseline utility for remission - Disutility as a result of PTS)                             |

## References:

1. Murthy SB, Shastri A, Merkler AE, et al. Intracerebral Hemorrhage Outcomes in Patients with Systemic Cancer. *J Stroke Cerebrovasc Dis* 2016;25(12):2918-24. doi: 10.1016/j.jstrokecerebrovasdis.2016.08.006 [published Online First: 2016/08/30]
2. Ihaddadene R, Le Gal G, Delluc A, et al. Dose escalation of low molecular weight heparin in patients with recurrent cancer-associated thrombosis. *Thromb Res* 2014;134(1):93-5. doi: 10.1016/j.thromres.2014.04.028 [published Online First: 2014/05/20]
3. Carrier M, Abou-Nassar K, Mallick R, et al. Apixaban to Prevent Venous Thromboembolism in Patients with Cancer. *N Engl J Med* 2019;380(8):711-19. doi: 10.1056/NEJMoa1814468 [published Online First: 2018/12/05]
4. Blix K, Gran OV, Severinsen MT, et al. Impact of time since diagnosis and mortality rate on cancer-associated venous thromboembolism: the Scandinavian Thrombosis and Cancer (STAC) cohort. *J Thromb Haemost* 2018;16(7):1327-35. doi: 10.1111/jth.14130 [published Online First: 2018/04/25]
5. Rohatgi A. Web Plot Digitizer.
6. Alotaibi GS, Wu C, Senthilselvan A, et al. Secular Trends in Incidence and Mortality of Acute Venous Thromboembolism: The AB-VTE Population-Based Study. *Am J Med* 2016;129(8):879 e19-25. doi: 10.1016/j.amjmed.2016.01.041 [published Online First: 2016/03/02]
7. Castellucci LA, Le Gal G, Rodger MA, et al. Major bleeding during secondary prevention of venous thromboembolism in patients who have completed anticoagulation: a systematic review and meta-analysis. *J Thromb Haemost* 2014;12(3):344-8. doi: 10.1111/jth.12501 [published Online First: 2014/01/11]
8. Hernandez I, Zhang Y, Brooks MM, et al. Anticoagulation Use and Clinical Outcomes After Major Bleeding on Dabigatran or Warfarin in Atrial Fibrillation. *Stroke* 2017;48(1):159-66. doi: 10.1161/STROKEAHA.116.015150 [published Online First: 2016/12/03]
9. Raskob GE, van Es N, Verhamme P, et al. Edoxaban for the Treatment of Cancer-Associated Venous Thromboembolism. *N Engl J Med* 2018;378(7):615-24. doi: 10.1056/NEJMoa1711948 [published Online First: 2017/12/13]
10. Rojas-Hernandez CM, Oo TH, Garcia-Perdomo HA. Risk of intracranial hemorrhage associated with therapeutic anticoagulation for venous thromboembolism in cancer patients: a systematic review and meta-analysis. *J Thromb Thrombolysis* 2017;43(2):233-40. doi: 10.1007/s11239-016-1434-4 [published Online First: 2016/10/06]
11. Ende-Verhaar YM, Cannegieter SC, Vonk Noordegraaf A, et al. Incidence of chronic thromboembolic pulmonary hypertension after acute pulmonary embolism: a contemporary view of the published literature. *Eur Respir J* 2017;49(2) doi: 10.1183/13993003.01792-2016 [published Online First: 2017/02/25]
12. Kahn SR, Shapiro S, Wells PS, et al. Compression stockings to prevent post-thrombotic syndrome: a randomised placebo-controlled trial. *The Lancet* 2014;383(9920):880-88. doi: 10.1016/s0140-6736(13)61902-9
13. Sacco S, Marini C, Toni D, et al. Incidence and 10-year survival of intracerebral hemorrhage in a population-based registry. *Stroke* 2009;40(2):394-9. doi: 10.1161/STROKEAHA.108.523209 [published Online First: 2008/11/29]
14. Cohen AT, Katholing A, Rietbrock S, et al. Epidemiology of first and recurrent venous thromboembolism in patients with active cancer. A population-based cohort study. *Thromb Haemost* 2017;117(1):57-65. doi: 10.1160/TH15-08-0686 [published Online First: 2016/10/07]
15. Li A, Kuderer NM, Garcia DA, et al. Direct oral anticoagulant for the prevention of thrombosis in ambulatory patients with cancer: A systematic review and meta-analysis. *J Thromb Haemost* 2019;17(12):2141-51. doi: 10.1111/jth.14613 [published Online First: 2019/08/20]
16. Canadian Cancer Statistics: A 2018 Special Report: Government of Canada; [Available from: <https://www.cancer.ca/~media/cancer.ca/CW/cancer%20information/cancer%20101/Canadian>

[%20cancer%20statistics/Canadian-Cancer-Statistics-2018-EN.pdf?la=en](#) accessed November 22 2019.

17. This Electronic Publication Contains Life Tables Comprising Life Expectancy and Related Estimates by Age and Sex for Canada, the Provinces and Territories, x, Government of Canada, Statistics Canada, 30 May 2019, [www150.statcan.gc.ca/n1/pub/84-537-x/84-537-x2019001-eng.htm](http://www150.statcan.gc.ca/n1/pub/84-537-x/84-537-x2019001-eng.htm): Government of Canada, Statistic Canada; [Available from: [www150.statcan.gc.ca/n1/pub/84-537-x/84-537-x2019001-eng.htm](http://www150.statcan.gc.ca/n1/pub/84-537-x/84-537-x2019001-eng.htm) accessed October 18 2019.
18. Sorensen HT, Mellekjaer L, Olsen JH, et al. Prognosis of cancers associated with venous thromboembolism. *N Engl J Med* 2000;343(25):1846-50. doi: 10.1056/NEJM200012213432504 [published Online First: 2000/12/16]
19. Nagata N, Sakurai T, Shimbo T, et al. Acute Severe Gastrointestinal Tract Bleeding Is Associated With an Increased Risk of Thromboembolism and Death. *Clin Gastroenterol Hepatol* 2017;15(12):1882-89 e1. doi: 10.1016/j.cgh.2017.06.028 [published Online First: 2017/06/22]
20. Gonzalez-Perez A, Gaist D, Wallander MA, et al. Mortality after hemorrhagic stroke: data from general practice (The Health Improvement Network). *Neurology* 2013;81(6):559-65. doi: 10.1212/WNL.0b013e31829e6eff [published Online First: 2013/07/12]
21. Delcroix M, Lang I, Pepke-Zaba J, et al. Long-Term Outcome of Patients With Chronic Thromboembolic Pulmonary Hypertension: Results From an International Prospective Registry. *Circulation* 2016;133(9):859-71. doi: 10.1161/CIRCULATIONAHA.115.016522 [published Online First: 2016/01/31]
22. Direct oral anticoagulants for the treatment of venous thromboembolic events: economic evaluation. Ottawa: CADTH; 2016 Mar. (CADTH technology review; no. 3) [accessed January 16, 2019.
23. Specogna AV, Turin TC, Patten SB, et al. Hospital treatment costs and length of stay associated with hypertension and multimorbidity after hemorrhagic stroke. *BMC Neurol* 2017;17(1):158. doi: 10.1186/s12883-017-0930-2 [published Online First: 2017/08/12]
24. Goeree R, Blackhouse G, Petrovic R, et al. Cost of stroke in Canada: a 1-year prospective study. *Journal of Medical Economics* 2008;8(1-4):147-67. doi: 10.3111/200508147167
25. Caprini JA, Botteman MF, Stephens JM, et al. Economic burden of long-term complications of deep vein thrombosis after total hip replacement surgery in the United States. *Value Health* 2003;6(1):59-74. doi: 10.1046/j.1524-4733.2003.00204.x [published Online First: 2003/01/22]
26. Rubens FD, Bourke M, Hynes M, et al. Surgery for chronic thromboembolic pulmonary hypertension--inclusive experience from a national referral center. *Ann Thorac Surg* 2007;83(3):1075-81. doi: 10.1016/j.athoracsur.2006.10.007 [published Online First: 2007/02/20]
27. Dranitsaris G, Shane LG, Crowther M, et al. Dalteparin versus vitamin K antagonists for the prevention of recurrent venous thromboembolism in patients with cancer and renal impairment: a Canadian pharmacoeconomic analysis. *Clinicoecon Outcomes Res* 2017;9:65-73. doi: 10.2147/CEOR.S126379 [published Online First: 2017/02/01]
28. Ontario Case Costing Initiative Ontario, Canada: Ministry of Health and Long Term Care; [Available from: [hsim.health.gov.on.ca/hdbportal/](http://hsim.health.gov.on.ca/hdbportal/) accessed January 31 2019.
29. Schedule of Benefits, Physician Services Under the Health Insurance Act: Ministry of Health and Long-Term Care; [Available from: [http://www.health.gov.on.ca/en/pro/programs/ohip/sob/physserv/sob\\_master2000306.pdf](http://www.health.gov.on.ca/en/pro/programs/ohip/sob/physserv/sob_master2000306.pdf) accessed January 16, 2019.
30. Ontario Drug Benefit Formulary: Ministry of Health and Long-Term Care; [Available from: <https://www.formulary.health.gov.on.ca/formulary> accessed April 1, 2019.
31. Sullivan PW, Slejko JF, Sculpher MJ, et al. Catalogue of EQ-5D scores for the United Kingdom. *Med Decis Making* 2011;31(6):800-4. doi: 10.1177/0272989X11401031 [published Online First: 2011/03/23]

32. McCarter H, Furlong W, Whitton AC, et al. Health status measurements at diagnosis as predictors of survival among adults with brain tumors. *J Clin Oncol* 2006;24(22):3636-43. doi: 10.1200/JCO.2006.06.0137 [published Online First: 2006/08/01]
33. Allareddy V, Kennedy J, West MM, et al. Quality of life in long-term survivors of bladder cancer. *Cancer* 2006;106(11):2355-62. doi: 10.1002/cncr.21896 [published Online First: 2006/05/02]
34. Best JH, Garrison LP, Hollingworth W, et al. Preference values associated with stage III colon cancer and adjuvant chemotherapy. *Qual Life Res* 2010;19(3):391-400. doi: 10.1007/s11136-010-9589-5 [published Online First: 2010/01/20]
35. Curran D, Pozzo C, Zaluski J, et al. Quality of life of palliative chemotherapy naive patients with advanced adenocarcinoma of the stomach or esophagogastric junction treated with irinotecan combined with 5-fluorouracil and folinic acid: results of a randomised phase III trial. *Qual Life Res* 2009;18(7):853-61. doi: 10.1007/s11136-009-9493-z [published Online First: 2009/07/02]
36. Doyle S, Lloyd A, Walker M. Health state utility scores in advanced non-small cell lung cancer. *Lung Cancer* 2008;62(3):374-80. doi: 10.1016/j.lungcan.2008.03.019 [published Online First: 2008/05/10]
37. Fossa SD, de Wit R, Roberts JT, et al. Quality of life in good prognosis patients with metastatic germ cell cancer: a prospective study of the European Organization for Research and Treatment of Cancer Genitourinary Group/Medical Research Council Testicular Cancer Study Group (30941/TE20). *J Clin Oncol* 2003;21(6):1107-18. doi: 10.1200/JCO.2003.02.075 [published Online First: 2003/03/15]
38. Uyl-de Groot CA, Buijt I, Gloudemans IJ, et al. Health related quality of life in patients with multiple myeloma undergoing a double transplantation. *Eur J Haematol* 2005;74(2):136-43. doi: 10.1111/j.1600-0609.2004.00346.x [published Online First: 2005/01/19]
39. Jewell EL, Smrka M, Broadwater G, et al. Utility scores and treatment preferences for clinical early-stage cervical cancer. *Value Health* 2011;14(4):582-6. doi: 10.1016/j.jval.2010.11.017 [published Online First: 2011/06/15]
40. Krahn MD, Bremner KE, Alibhai SM, et al. A reference set of health utilities for long-term survivors of prostate cancer: population-based data from Ontario, Canada. *Qual Life Res* 2013;22(10):2951-62. doi: 10.1007/s11136-013-0401-1 [published Online First: 2013/04/09]
41. Kulkarni GS, Alibhai SM, Finelli A, et al. Cost-effectiveness analysis of immediate radical cystectomy versus intravesical Bacillus Calmette-Guerin therapy for high-risk, high-grade (T1G3) bladder cancer. *Cancer* 2009;115(23):5450-9. doi: 10.1002/cncr.24634 [published Online First: 2009/08/18]
42. Papaioannou D, Rafia R, Rathbone J, et al. Rituximab for the first-line treatment of stage III-IV follicular lymphoma (review of Technology Appraisal No. 110): a systematic review and economic evaluation. *Health Technol Assess* 2012;16(37):1-253, iii-iv. doi: 10.3310/hta16370 [published Online First: 2012/10/02]
43. Pelligra CG, Parikh K, Guo S, et al. Cost-effectiveness of Pomalidomide, Carfilzomib, and Daratumumab for the Treatment of Patients with Heavily Pretreated Relapsed-refractory Multiple Myeloma in the United States. *Clin Ther* 2017;39(10):1986-2005 e5. doi: 10.1016/j.clinthera.2017.08.010 [published Online First: 2017/10/03]
44. Rogers G, Garside R, Mealing S, et al. Carmustine implants for the treatment of newly diagnosed high-grade gliomas: a cost-utility analysis. *Pharmacoeconomics* 2008;26(1):33-44. doi: 10.2165/00019053-200826010-00004 [published Online First: 2007/12/20]
45. Romanus D, Kindler HL, Archer L, et al. Does health-related quality of life improve for advanced pancreatic cancer patients who respond to gemcitabine? Analysis of a randomized phase III trial of the cancer and leukemia group B (CALGB 80303). *J Pain Symptom Manage* 2012;43(2):205-17. doi: 10.1016/j.jpainsymman.2011.09.001 [published Online First: 2011/11/23]
46. Shiroiwa T, Fukuda T, Shimozuma K. Cost-effectiveness analysis of trastuzumab to treat HER2-positive advanced gastric cancer based on the randomised ToGA trial. *Br J Cancer* 2011;105(9):1273-8. doi: 10.1038/bjc.2011.390 [published Online First: 2011/10/01]

47. Stewart ST, Lenert L, Bhatnagar V, et al. Utilities for prostate cancer health states in men aged 60 and older. *Med Care* 2005;43(4):347-55. doi: 10.1097/01.mlr.0000156862.33341.45 [published Online First: 2005/03/22]
48. Hogg K, Kimpton M, Carrier M, et al. Estimating quality of life in acute venous thrombosis. *JAMA Intern Med* 2013;173(12):1067-72. doi: 10.1001/jamainternmed.2013.563 [published Online First: 2013/05/22]
49. Meads DM, McKenna SP, Doughty N, et al. The responsiveness and validity of the CAMPHOR Utility Index. *Eur Respir J* 2008;32(6):1513-9. doi: 10.1183/09031936.00069708 [published Online First: 2008/09/05]
50. Lenert LA, Soetikno RM. Automated computer interviews to elicit utilities: potential applications in the treatment of deep venous thrombosis. *J Am Med Inform Assoc* 1997;4(1):49-56. doi: 10.1136/jamia.1997.0040049 [published Online First: 1997/01/01]
51. Gage BF, Cardinalli AB, Owens DK. The effect of stroke and stroke prophylaxis with aspirin or warfarin on quality of life. *Arch Intern Med* 1996;156(16):1829-36. [published Online First: 1996/09/09]
52. Carrier M, Abou-Nassar K, Mallick R, et al. Apixaban to Prevent Venous Thromboembolism in Patients with Cancer. *New England Journal of Medicine* 2018;380(8):711-19. doi: 10.1056/NEJMoa1814468
53. Li A, Carlson JJ, Kuderer NM, et al. Cost-effectiveness analysis of low-dose direct oral anticoagulant (DOAC) for the prevention of cancer-associated thrombosis in the United States. *Cancer* 2020;126(8):1736-48. doi: 10.1002/cncr.32724 [published Online First: 2020/01/31]
